# Supplementary material
Source: HighWire-hosted journal article supplement (http://rapm.bmj.com/highwire/filestream/14547/field_highwire_adjunct_files/1/rapm-2020-102154supp002_data_supplement.pdf)
Supplement: rapm-2020-102154supp002_data_supplement.pdf [file rapm-2020-102154supp002_data_supplement.pdf]

**Supplementary File 2**

| Extracted data                                                   |                                                                                                                                                                                                                                                                                                                                                                                                               |
|------------------------------------------------------------------|---------------------------------------------------------------------------------------------------------------------------------------------------------------------------------------------------------------------------------------------------------------------------------------------------------------------------------------------------------------------------------------------------------------|
| <b>Age</b>                                                       | In years (integer)                                                                                                                                                                                                                                                                                                                                                                                            |
| <b>Sex</b>                                                       | Male / Female                                                                                                                                                                                                                                                                                                                                                                                                 |
| <b>BMI</b>                                                       | Weight in kilograms/(Height in meters) <sup>2</sup> , 1 decimal                                                                                                                                                                                                                                                                                                                                               |
| <b>ASA physical status<sup>1</sup></b>                           | As reported by author or based on comorbidities reported by author                                                                                                                                                                                                                                                                                                                                            |
| <b>Coagulation status</b>                                        | No regular anticoagulant drugs, antiplatelet (e.g. aspirin/clopidogrel), prophylactic low molecular weight heparin (LMWH), therapeutic LMWH, vitamin K antagonist, direct oral anticoagulants (DOAC), heparin infusion, urokinase infusion, multi-therapy (≥ 2 different anticoagulant drugs), coagulation disorder, mistake in drug administration, unspecified anticoagulant therapy, or: 'other', describe |
| <b>Type of neuraxial technique</b>                               | Continuous epidural anaesthesia, spinal anaesthesia, combined spinal-epidural procedure, spinal catheter, spinal cord stimulator, epidural injection, caudal block, or: 'other', describe                                                                                                                                                                                                                     |
| <b>Needle size</b>                                               | In Gauge                                                                                                                                                                                                                                                                                                                                                                                                      |
| <b>Report of complicated puncture</b>                            | Easy/uncomplicated puncture, difficult/multiple punctures, 'bloody tap', inadvertent dural puncture                                                                                                                                                                                                                                                                                                           |
| <b>Number of attempts for neuraxial block (NB)</b>               | Integer                                                                                                                                                                                                                                                                                                                                                                                                       |
| <b>Number of levels spinal cord attempted</b>                    | Integer                                                                                                                                                                                                                                                                                                                                                                                                       |
| <b>Experience of anesthesiologist performing NB</b>              | Resident (≤5 years of experience) / anesthesiologist (>5 years of experience)                                                                                                                                                                                                                                                                                                                                 |
| <b>Level of regional technique</b>                               | Cervical, thoracic, lumbar or sacral/caudal                                                                                                                                                                                                                                                                                                                                                                   |
| <b>Puncture height</b>                                           | Between two vertebrae; upper vertebra noted                                                                                                                                                                                                                                                                                                                                                                   |
| <b>Indication for neuraxial block/Type of procedure</b>          | Minor orthopedic, Major orthopedic, Chronic pain management, Minor digestive, Major digestive, Peripheral vascular, Obstetric: Labor analgesia, Obstetric: Caesarean section, Urologic, Aortic, Thoracotomy, Thoracoscopy, Gynecologic oncology/surgery, EVAR, Cardiac surgery, Trauma, Amputation (leg) / Extremities, Neurosurgical, or: 'other', describe                                                  |
| <b>Hours to removal of catheter from time point 0</b>            | Time point 0 is first attempt NB, rounded to full hours. Variable only applicable for cases treated with a catheter.                                                                                                                                                                                                                                                                                          |
| <b>Hours to symptom onset from time point 0</b>                  | Time point 0 is first attempt NB, rounded to full hours. All symptoms, including among others pain, seizures, disorientation, nausea/vomiting, neurological deficits (motor and sensory disturbances) and Glasgow Coma Scale (GCS) disturbances. See variable 'Symptoms' below.                                                                                                                               |
| <b>Hours to onset neurological symptoms from time point 0</b>    | Time point 0 is first attempt NB, rounded to full hours. First neurological symptoms describe motor/sensory disturbances and disturbed GCS.                                                                                                                                                                                                                                                                   |
| <b>Hours to evacuation of hematoma/abscess from time point 0</b> | Time point 0 is first attempt NB, rounded to full hours                                                                                                                                                                                                                                                                                                                                                       |
| <b>Hours to diagnosis from time point 0</b>                      | Time point 0 is first attempt NB, rounded to full hours. Diagnosis by CT/MRI-scan.                                                                                                                                                                                                                                                                                                                            |
| <b>Hours progression of symptoms</b>                             | From onset of first symptoms to worst symptoms evaluated, rounded to full hours                                                                                                                                                                                                                                                                                                                               |

|                                                                  |                                                                                                                                                                                                                                                                                                                                                                                                                                                                                                                                                                                                                                                                        |
|------------------------------------------------------------------|------------------------------------------------------------------------------------------------------------------------------------------------------------------------------------------------------------------------------------------------------------------------------------------------------------------------------------------------------------------------------------------------------------------------------------------------------------------------------------------------------------------------------------------------------------------------------------------------------------------------------------------------------------------------|
| <b>Hours to symptom onset after predisposing causative event</b> | Causative event is defined as: i.e. NB onset, removal of catheter or dose of anticoagulant, rounded to full hours                                                                                                                                                                                                                                                                                                                                                                                                                                                                                                                                                      |
| <b>Hours to evacuation of complication from symptoms onset</b>   | Duration of first symptoms to evacuation of hematoma/abscess, rounded to full hours                                                                                                                                                                                                                                                                                                                                                                                                                                                                                                                                                                                    |
| <b>Time point of complication as suspected by author</b>         | 'During puncture': symptoms during/directly after puncture, including epidural analgesia, spinal cord stimulator (SCS), continuous spinal anaesthesia (spinal catheter), and failed regional techniques. 'During drugs administration': when drugs were administered through a catheter or treatment with SCS was ongoing. 'After removal of catheter': if catheter or SCS was removed, or 'After spinal anaesthesia'                                                                                                                                                                                                                                                  |
| <b>Symptoms</b>                                                  | Pain: scored as partial/mild, full/severe, present; degree not further specified<br>Sensory deficit: scored as partial/mild, full/severe, present; degree not further specified<br>Motor deficit: scored as partial/mild, full/severe, present; degree not further specified<br>Post-dural puncture headache (present : absent)<br>Seizures (present : absent)<br>Aphasia/Dysarthria (present : absent)<br>Visual disturbance (present : absent)<br>Vomiting/Nausea/Dizziness (present : absent)<br>Drowsy/Disorientation (present : absent)<br>GCS disturbed (present : absent), a disturbed GCS is defined as a GCS < 13<br>GCS count if GCS disturbed, median [IQR] |
| <b>Surgical evacuation</b>                                       | Yes / No                                                                                                                                                                                                                                                                                                                                                                                                                                                                                                                                                                                                                                                               |
| <b>Epidural Blood Patch (EBP)</b>                                | Yes / No                                                                                                                                                                                                                                                                                                                                                                                                                                                                                                                                                                                                                                                               |
| <b>Neurological recovery</b>                                     | Full recovery, delayed but full recovery (recovery after more than 1 month from symptom onset), partial recovery, no recovery, death                                                                                                                                                                                                                                                                                                                                                                                                                                                                                                                                   |
| <b>Type of hematoma/abscess</b>                                  | Intracranial, spinal and intracranial                                                                                                                                                                                                                                                                                                                                                                                                                                                                                                                                                                                                                                  |
| <b>Space</b>                                                     | Epidural / Subdural / Subarachnoidal / Intraparenchymal                                                                                                                                                                                                                                                                                                                                                                                                                                                                                                                                                                                                                |
| <b>Location</b>                                                  | Unilateral / Bilateral / Midline                                                                                                                                                                                                                                                                                                                                                                                                                                                                                                                                                                                                                                       |
| <b>Practice consistent with current guideline</b>                | Consistent with most recent guideline Neuraxial Block and Anticoagulant Drugs – Dutch Society of Anaesthesiology <sup>2</sup>                                                                                                                                                                                                                                                                                                                                                                                                                                                                                                                                          |

Supplementary File Table 2. Extracted data in reports of intracranial hematoma or abscess after neuraxial block. BMI: body mass index, ASA: American Society of Anesthesiologists, LMWH: low molecular weight heparin, DOAC: direct oral anticoagulants (DOAC), NB: neuraxial block, EVAR: endovascular aneurysm repair, GCS: Glasgow Coma Scale, CT: computed tomography, MRI: magnetic resonance imaging, SCS: spinal cord stimulator.

**References**

1. Owens WD, Felts JA, Spitznagel EL. ASA physical status classifications: a study of consistency of ratings. *Anesthesiology*. 1978;49(4):239-243.
2. Dutch Society of Anesthesiology - (Nederlandse Vereniging voor Anesthesiologie). Guideline "Neuraxial blockade and Anticoagulant Drugs" - (Richtlijn 'Neuraxisblokkade en Antistolling). Available from [https://internisten.nl/sites/internisten.nl/files/uploads/Ge/KH/GeKH\\_R9RDvLI3-1uw1yqCg/richtlijn\\_2014\\_neuraxisblokkade-en-antistolling.pdf](https://internisten.nl/sites/internisten.nl/files/uploads/Ge/KH/GeKH_R9RDvLI3-1uw1yqCg/richtlijn_2014_neuraxisblokkade-en-antistolling.pdf). Published 2014. (accessed August 1 2017)
